# Supplementary material for: F2BMF (M = B and Al) Molecules: A Matrix Infrared Spectra and Theoretical Calculations Investigation
Source: MDPI journal article supplement (doi:10.3390/molecules28020554), 2023-01-05
Supplement: s1 [file s1]

# F<sub>2</sub>BMF (M = B and Al) Molecules: A Matrix Infrared Spectra and Theoretical Calculations Investigation

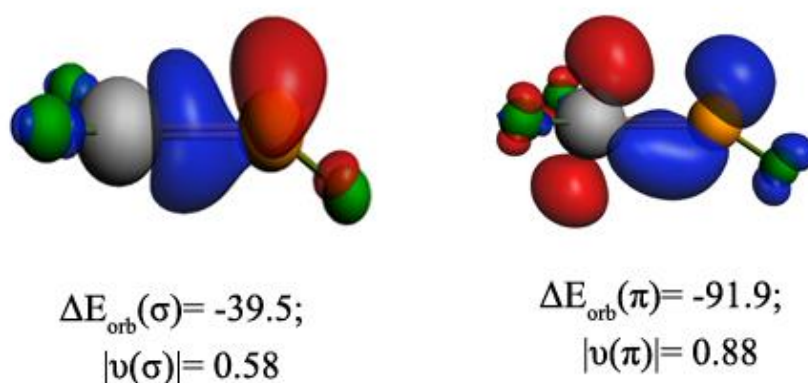

| $\Delta E_{\text{int}}$ | $\Delta E_{\text{Pauli}}$ | $\Delta E_{\text{elstat}}$ | $\Delta E_{\text{orb}}$ | $\Delta E_{\sigma}$ | $\Delta E_{\pi}$ | $\Delta E_{\text{orb(rest)}}$ | $\Delta E_{\text{dist}}$ |
|-------------------------|---------------------------|----------------------------|-------------------------|---------------------|------------------|-------------------------------|--------------------------|
| -122.0                  | 59.1                      | -46.8<br>(25.8%)           | -134.7<br>(74.2%)       | -39.5<br>(29.3%)    | -91.9<br>(68.3%) | -3.3<br>(2.4%)                | 0.39                     |

**Figure S1.** Plot of the deformation densities  $\Delta\rho$  of the  $\text{BF} \rightarrow \text{AlF}_2$   $\sigma$  donation and  $\text{AlF}_2 \rightarrow \text{BF}$   $\pi$  back-donation in  $\text{FBAlF}_2$  with the associated interaction energy  $\Delta E_{\text{orb}}$  and charge eigenvalues  $|v_n|$  (in e). The charge flow is from red  $\rightarrow$  blue.

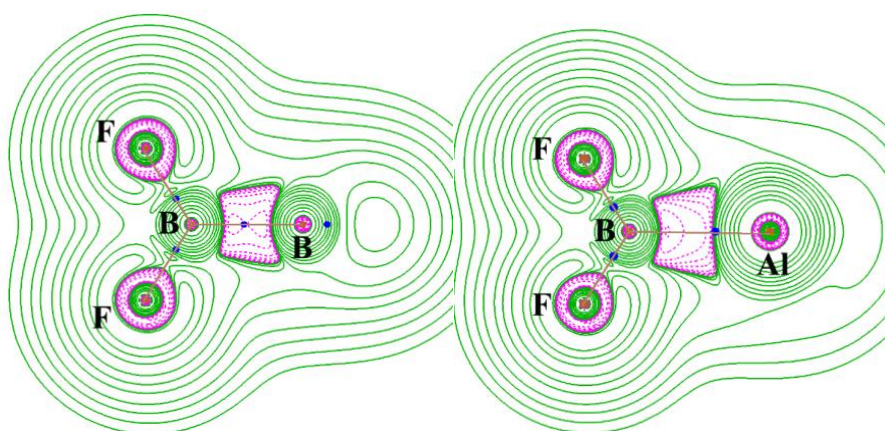

**Figure S2.** Contour line diagrams of the Laplacian of the electronic density of  $\text{F}_2\text{BMF}$  (M = B, Al). Red lines are in regions of the negative charge concentrations ( $\nabla^2 \rho(r) < 0$ ); Green lines are in regions of the positive charge depletion ( $\nabla^2 \rho(r) > 0$ ).

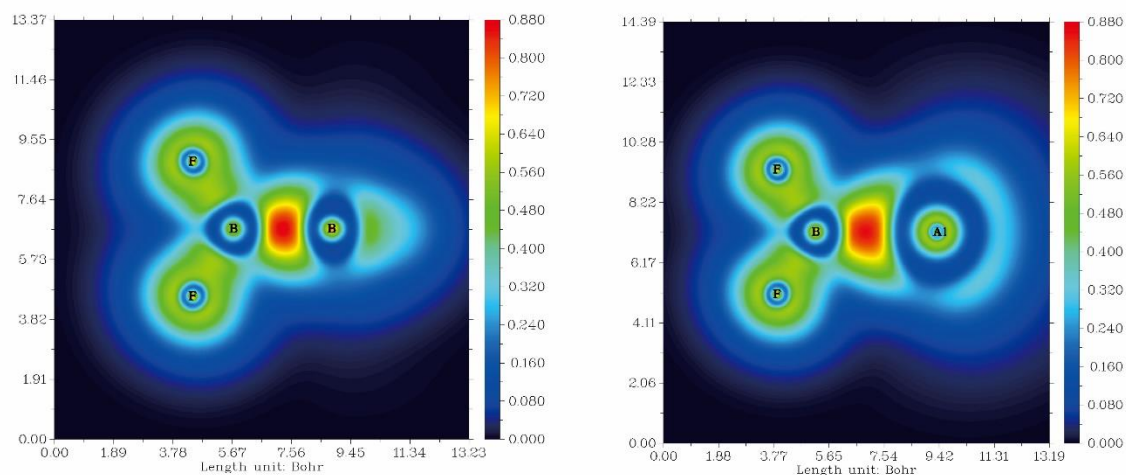

**Figure S3.** Color-filled maps of localized orbital locator of F<sub>2</sub>BMF molecules (M = B, Al) at B3LYP/def2-TZVPP level.

**Table S1.** Compositions of Natural Bond Orbitals from NBO Analysis of F<sub>2</sub>BMF molecules (M = B, Al).

| Molecule            | Bond                                    | NBO                                                                                                                                       | OCC           |
|---------------------|-----------------------------------------|-------------------------------------------------------------------------------------------------------------------------------------------|---------------|
| F <sub>2</sub> BBF  | B <sup>1</sup> -B <sup>4</sup> $\sigma$ | 34.50%B <sup>1</sup> (s <sup>0.29</sup> p <sup>0.71</sup> )+65.50%B <sup>4</sup> (s <sup>0.66</sup> p <sup>0.34</sup> )                   | $\alpha$ 0.95 |
|                     |                                         | 47.41%B <sup>1</sup> (s <sup>0.41</sup> p <sup>0.59</sup> )+52.59%B <sup>4</sup> (s <sup>0.62</sup> p <sup>0.38</sup> )                   | $\beta$ 0.99  |
|                     | B <sup>1</sup> -B <sup>4</sup> $\pi$    | 34.13%B <sup>1</sup> (s <sup>0.15</sup> p <sup>0.85</sup> )+66.87%B <sup>4</sup> (p)                                                      | $\alpha$ 0.96 |
|                     | F <sup>1</sup> -B <sup>1</sup> $\sigma$ | 17.42%B <sup>1</sup> (s <sup>0.28</sup> p <sup>0.71</sup> d <sup>0.01</sup> )+82.58%F <sup>1</sup> (s <sup>0.44</sup> p <sup>0.56</sup> ) | $\alpha$ 1.00 |
|                     |                                         | 17.42%B <sup>1</sup> (s <sup>0.29</sup> p <sup>0.70</sup> d <sup>0.01</sup> )+82.58%F <sup>2</sup> (s <sup>0.44</sup> p <sup>0.56</sup> ) | $\beta$ 1.00  |
|                     | F <sup>2</sup> -B <sup>1</sup> $\sigma$ | 17.42%B <sup>1</sup> (s <sup>0.28</sup> p <sup>0.71</sup> d <sup>0.01</sup> )+82.58%F <sup>1</sup> (s <sup>0.44</sup> p <sup>0.56</sup> ) | $\alpha$ 1.00 |
|                     |                                         | 17.42%B <sup>1</sup> (s <sup>0.29</sup> p <sup>0.70</sup> d <sup>0.01</sup> )+82.58%F <sup>2</sup> (s <sup>0.44</sup> p <sup>0.56</sup> ) | $\beta$ 1.00  |
|                     | B <sup>4</sup> -F <sup>3</sup> $\sigma$ | 16.05%B <sup>4</sup> (s <sup>0.35</sup> p <sup>0.65</sup> )+83.95%F <sup>3</sup> (s <sup>0.44</sup> p <sup>0.56</sup> )                   | $\alpha$ 1.00 |
|                     |                                         | 15.97%B <sup>4</sup> (s <sup>0.36</sup> p <sup>0.64</sup> )+84.03%F <sup>3</sup> (s <sup>0.45</sup> p <sup>0.55</sup> )                   | $\beta$ 1.00  |
| F <sub>2</sub> BAIF | B-Al $\sigma$                           | 76.09%B(s <sup>0.44</sup> p <sup>0.56</sup> )+25.57%Al(s <sup>0.16</sup> p <sup>0.82</sup> d <sup>0.02</sup> )                            | $\alpha$ 0.99 |
|                     |                                         | 50.50% B(s <sup>0.39</sup> p <sup>0.61</sup> )+49.50%Al(s <sup>0.83</sup> p <sup>0.17</sup> )                                             | $\beta$ 0.99  |
|                     | Al (LP)                                 | 100%Al(s <sup>0.75</sup> p <sup>0.25</sup> )                                                                                              | $\alpha$ 0.98 |
|                     | F <sup>1</sup> -B $\sigma$              | 16.14%B(s <sup>0.28</sup> p <sup>0.71</sup> d <sup>0.01</sup> )+83.86%F <sup>1</sup> (s <sup>0.46</sup> p <sup>0.54</sup> )               | $\alpha$ 0.99 |
|                     |                                         | 16.43%B(s <sup>0.30</sup> p <sup>0.69</sup> d <sup>0.01</sup> )+83.57%F <sup>1</sup> (s <sup>0.45</sup> p <sup>0.55</sup> )               | $\beta$ 0.99  |
|                     | F <sup>2</sup> -B $\sigma$              | 16.14%B(s <sup>0.28</sup> p <sup>0.71</sup> d <sup>0.01</sup> )+83.86%F <sup>1</sup> (s <sup>0.46</sup> p <sup>0.54</sup> )               | $\alpha$ 0.99 |
|                     |                                         | 16.43%B(s <sup>0.30</sup> p <sup>0.69</sup> d <sup>0.01</sup> )+83.57%F <sup>1</sup> (s <sup>0.45</sup> p <sup>0.55</sup> )               | $\beta$ 0.99  |

All the data are calculated by B3LYP hybrid density functional. LP denotes lone pair.

**Table S2.** Effective Bond Order Computed at B3LYP/def2-TZVPP level of F<sub>2</sub>BMF molecules (M = B, Al).

| Orbital           | F <sub>2</sub> BBF | F <sub>2</sub> BAIF |
|-------------------|--------------------|---------------------|
| a( $\sigma_1$ )   | 0.952              | 0.989               |
| a( $\sigma_1^*$ ) | 0.084              | 0.020               |
| a( $\sigma_2$ )   | 0.956              | 0.988               |
| a( $\sigma_2^*$ ) | 0.117              | 0.042               |
| a( $\pi$ )        | 0.995              | /                   |
| a( $\pi^*$ )      | 0.016              | /                   |
| EBO               | 1.32               | 0.96                |
| WBI               | 1.05               | 0.69                |

**Table S3.** Calculated Fundamental Frequencies of F<sub>2</sub>BBF and F<sub>2</sub>AlBF isotopomers in the Ground <sup>2</sup>A State.

| Approximate description          | Cal(int) <sup>a</sup>                             | Cal(int) <sup>b</sup> | Cal(int) <sup>c</sup> | Cal(int) <sup>d</sup> | Cal(int) <sup>a</sup>                             | Cal(int) <sup>b</sup> | Cal(int) <sup>c</sup> | Cal(int) <sup>d</sup> |
|----------------------------------|---------------------------------------------------|-----------------------|-----------------------|-----------------------|---------------------------------------------------|-----------------------|-----------------------|-----------------------|
|                                  | <b>F<sub>2</sub><sup>11</sup>B<sup>11</sup>BF</b> |                       |                       |                       | <b>F<sub>2</sub><sup>10</sup>B<sup>11</sup>BF</b> |                       |                       |                       |
| <b>BBFantisymstr</b>             | 1458.1(196)                                       | 1491.2(52)            | 1461.7(50)            | 1466.2                | 1502.2(312)                                       | 1501.4(41)            | 1471.7(37)            | 1477.8                |
| <b>BF<sub>2</sub>antisymstr</b>  | 1425.9(204)                                       | 1332.3(294)           | 1286.7(265)           | 1376.3                | 1453.7(123)                                       | 1378.8(317)           | 1331.6(284)           | 1425.1                |
| <b>BF<sub>2</sub>symstr</b>      | 1261.1(370)                                       | 1188.9(465)           | 1150.9(427)           | 1213.6                | 1287.1(384)                                       | 1221.3(505)           | 1182.6(465)           | 1245.4                |
| <b>BF<sub>2</sub>scis</b>        | 762.0(4)                                          | 658.5(24)             | 640.0(18)             | 674.6                 | 775.5(8)                                          | 663.9(22)             | 644.8(16)             | 683.5                 |
| <b>BF<sub>2</sub>B def</b>       | 661.3(49)                                         | 570.9(19)             | 540.0(13)             | 605.9                 | 675.6(48)                                         | 591.6(20)             | 560.2(14)             | 624.1                 |
| <b>BF<sub>2</sub> bend</b>       | 485.2(26)                                         | 401.0(1)              | 387.3(1)              | 414.1                 | 488.0(27)                                         | 401.3(1)              | 387.6(1)              | 414.9                 |
| <b>FBB wag</b>                   | 465.6(3)                                          | 366.5(0)              | 363.8(0)              | 335.5                 | 466.7(3)                                          | 367.5(0.7)            | 364.7(0)              | 336.6                 |
| <b>BBF bend</b>                  | 295.8(11)                                         | 188.3(15)             | 182.3(14)             | 194.3                 | 296.7(11)                                         | 188.9(15)             | 187.8(14)             | 195.1                 |
| <b>BF<sub>2</sub>BF def</b>      | 182.5(6)                                          | 125.2(2)              | 119.5(2)              | 115.5                 | 183.1(6)                                          | 125.6(2.5)            | 119.9(2)              | 115.8                 |
|                                  | <b>F<sub>2</sub><sup>11</sup>B<sup>10</sup>BF</b> |                       |                       |                       | <b>F<sub>2</sub><sup>10</sup>B<sup>10</sup>BF</b> |                       |                       |                       |
| <b>BBFantisymstr</b>             | 1485.7(89)                                        | 1538.6(70)            | 1508.0(63)            | 1511.4                | 1512.1(201)                                       | 1546.8(56)            | 1516.6(49)            | 1520.8                |
| <b>BF<sub>2</sub>antisymstr</b>  | 1437.5(316)                                       | 1332.3(294)           | 1286.7(265)           | 1376.3                | 1478.2(228)                                       | 1378.9(324)           | 1331.6(284)           | 1425.1                |
| <b>BF<sub>2</sub>symstr</b>      | 1270.5(373)                                       | 1192.3(462)           | 1154.2(424)           | 1217.9                | 1301.1(399)                                       | 1226.3(505)           | 1187.3(463)           | 1251.9                |
| <b>BF<sub>2</sub>scis</b>        | 776.4(3)                                          | 663.8(25)             | 644.9(19)             | 683.1                 | 789.0(7)                                          | 669.3(23)             | 649.8(17)             | 682.1                 |
| <b>BF<sub>2</sub>B def</b>       | 661.5(3)                                          | 572.7(19)             | 542.1(13)             | 607.1                 | 676.0(48)                                         | 593.0(20)             | 561.6(14)             | 624.7                 |
| <b>BF<sub>2</sub> bend</b>       | 493.7(27)                                         | 405.5(1)              | 391.3(1)              | 419.5                 | 496.9(28)                                         | 405.9(0.98)           | 391.7(1)              | 420.5                 |
| <b>FBB wag</b>                   | 480.8(4)                                          | 378.2(0)              | 375.7(0)              | 345.6                 | 482.0(4)                                          | 379.2(0.1)            | 376.6(0)              | 346.6                 |
| <b>BBF bend</b>                  | 298.2(11)                                         | 192.6(16)             | 191.6(15)             | 197.8                 | 299.2(11)                                         | 193.2(16)             | 192.3(15)             | 198.7                 |
| <b>BF<sub>2</sub>BF def</b>      | 183.7(6)                                          | 125.9(2.5)            | 120.0(2)              | 116.3                 | 184.4(6)                                          | 126.3(2.5)            | 120.5(2)              | 116.6                 |
|                                  | <b>F<sub>2</sub><sup>11</sup>BAlF</b>             |                       |                       |                       | <b>F<sub>2</sub><sup>10</sup>BAlF</b>             |                       |                       |                       |
| <b>BF<sub>2</sub>antisymmstr</b> | 1411.1(300)                                       | 1312.0(277)           | 1270.9(257)           | 1342.1                | 1460.4(321)                                       | 1357.4(299)           | 1314.9(275)           |                       |
| <b>BF<sub>2</sub>symstr</b>      | 1277.2(319)                                       | 1172.2(320)           | 1133.9(309)           | 1190.3                | 1317.8(347)                                       | 1208.2(378)           | 1168.8(336)           | 1227.4                |
| <b>AlFstr</b>                    | 831.0(117)                                        | 806.7(106)            | 780.1(98)             | 814.5                 | 831.0(116)                                        | 806.8(106)            | 780.2(98)             | 814.6                 |
| <b>BF<sub>2</sub>scis</b>        | 624.5(15)                                         | 566.6(20)             | 549.5(17)             | 576.0                 | 631.0(12)                                         | 572.5(18)             | 555.2(15)             | 582.0                 |
| <b>F<sub>2</sub>BAlF def</b>     | 559.0(29)                                         | 466.8(32)             | 453.4(31)             | 472.9                 | 580.9(33)                                         | 484.6(34)             | 470.4(34)             | 491.1                 |
| <b>F<sub>2</sub>BAlF def</b>     | 338.3(30)                                         | 300.7(12)             | 290.7(8)              | 311.9                 | 338.8(31)                                         | 301.6(13)             | 291.6(9)              | 312.8                 |
| <b>F<sub>2</sub>BAl wag</b>      | 231.2(1)                                          | 162.1(0)              | 157.3(0)              | 166.7                 | 232.5(1)                                          | 163.1(0)              | 158.2(0)              | 167.7                 |
| <b>BAlF bend</b>                 | 156.7(15)                                         | 118.7(9)              | 114.3(9)              | 124.7                 | 1567.0(15)                                        | 118.9(9)              | 114.5(7)              | 124.9                 |
| <b>F<sub>2</sub>BAlF def</b>     | 99.9(8)                                           | 49.9(4)               | 52.9(4)               | 33.8                  | 99.9(8)                                           | 49.9(4)               | 52.9(4)               | 33.8                  |

The vibrational frequencies (cm<sup>-1</sup>) and intensities (km/mol, in parentheses) are calculated using: <sup>a</sup> CAS(9e, 11o)/def2-TZVP basis set; <sup>b</sup> B3LYP/def2-TZVPP basis set.; <sup>c</sup> BPW91/def2-TZVPP basis set; <sup>d</sup>CCSD(T)/def2-TZVP(-f) basis set.

The value predicted by CASSCF method is 1425.9 (1453.7) and 1261.1(1287.1) cm<sup>-1</sup> for the anti-symmetric and symmetric B-F stretching modes of F<sub>2</sub><sup>11</sup>B(<sup>10</sup>B)-<sup>11</sup>BF molecule, which is overestimated by about 93.6 cm<sup>-1</sup> (74.9 cm<sup>-1</sup>) and 72.2 cm<sup>-1</sup> (65.8 cm<sup>-1</sup>) respectively. For F<sub>2</sub><sup>11</sup>B(<sup>10</sup>B)-<sup>10</sup>BF molecule, the predicted value calculated by CASSCF is also overestimated by 98.0 cm<sup>-1</sup> (107.6 cm<sup>-1</sup>) and 69.7 cm<sup>-1</sup> (59.5 cm<sup>-1</sup>). Similarly, for the F<sub>2</sub>BAlF molecule, the calculated BF<sub>2</sub> anti-symmetric and symmetric mode is at 1411.1 and 1277.2 cm<sup>-1</sup> by CASSCF method, , being overestimated by about 129.5 cm<sup>-1</sup> and 96.4 cm<sup>-1</sup> respectively.
